# Supplementary material
Source: PubMed Central journal article supplement (PMC5531599)
Supplement: NIHMS880337-supplement-1.pdf [file NIHMS880337-supplement-1.pdf]

Figure S1 Related to Figure 1

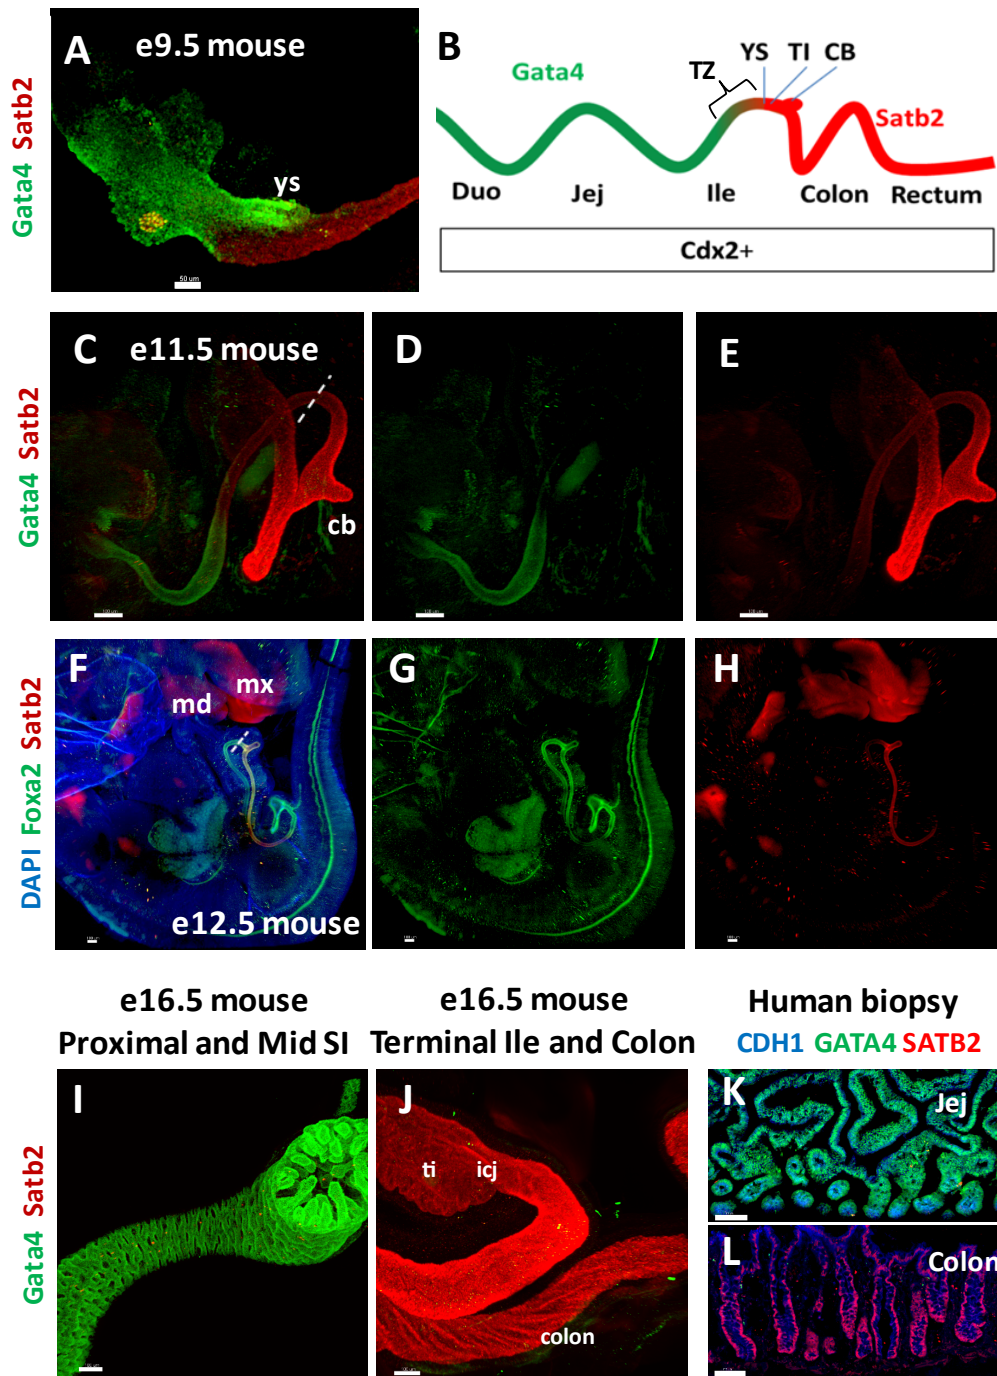

Figure S2 Related to Figure 1 and Figure 2

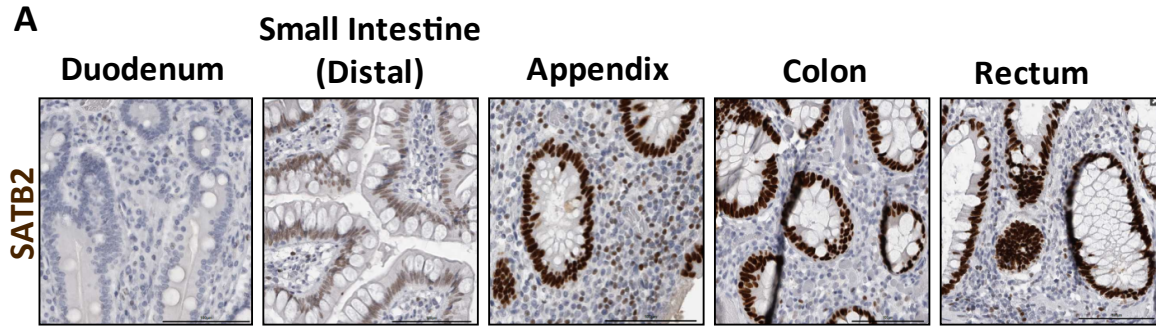

www.proteinatlas.org

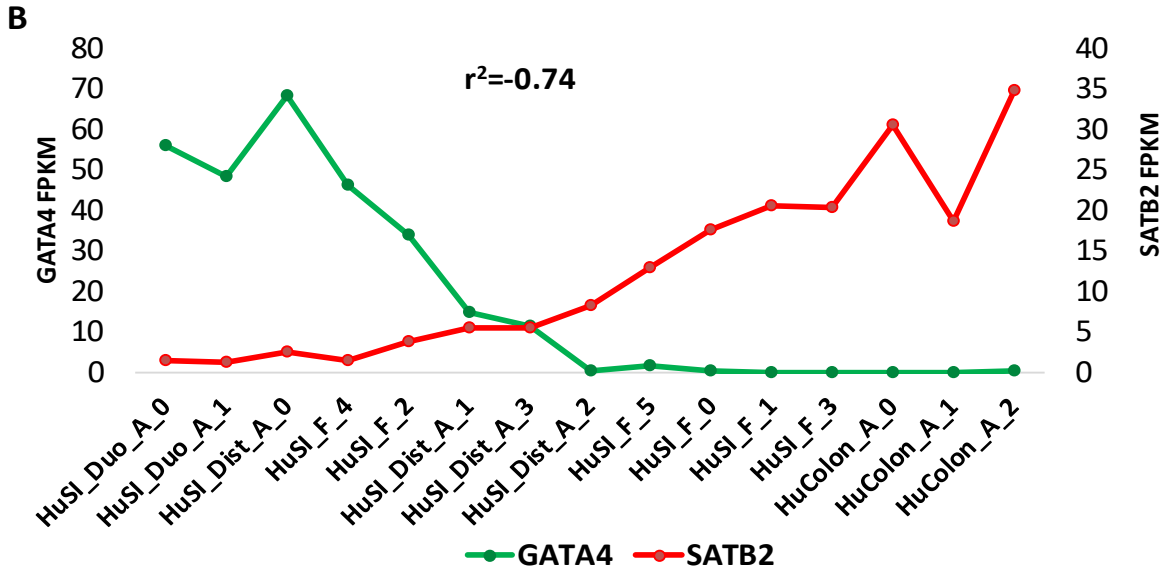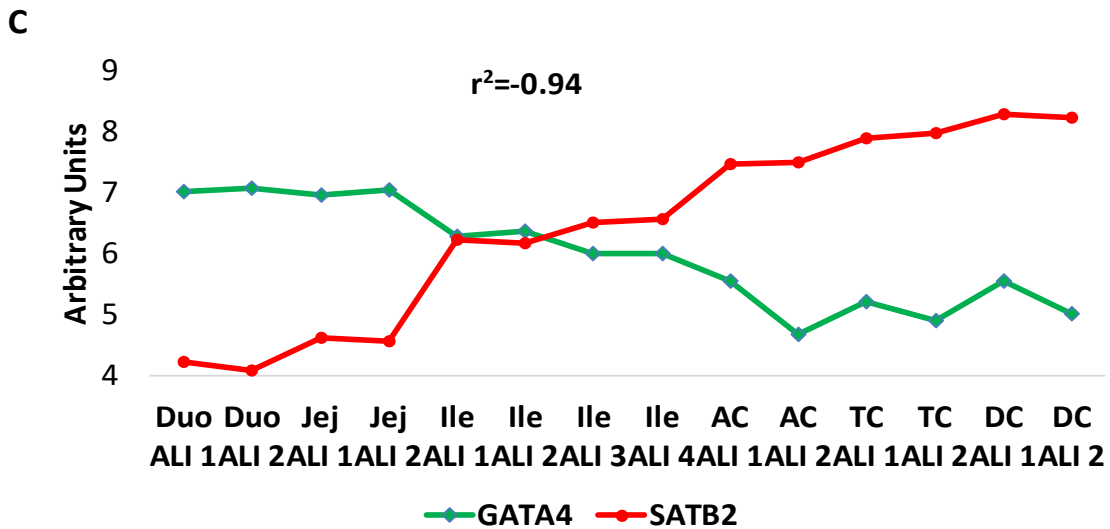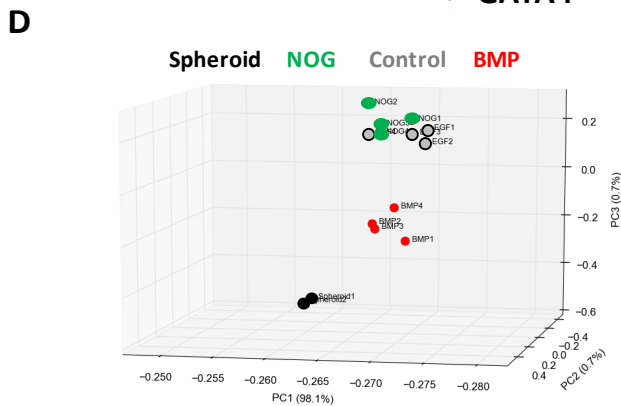

Figure S3 Related to Figure 2

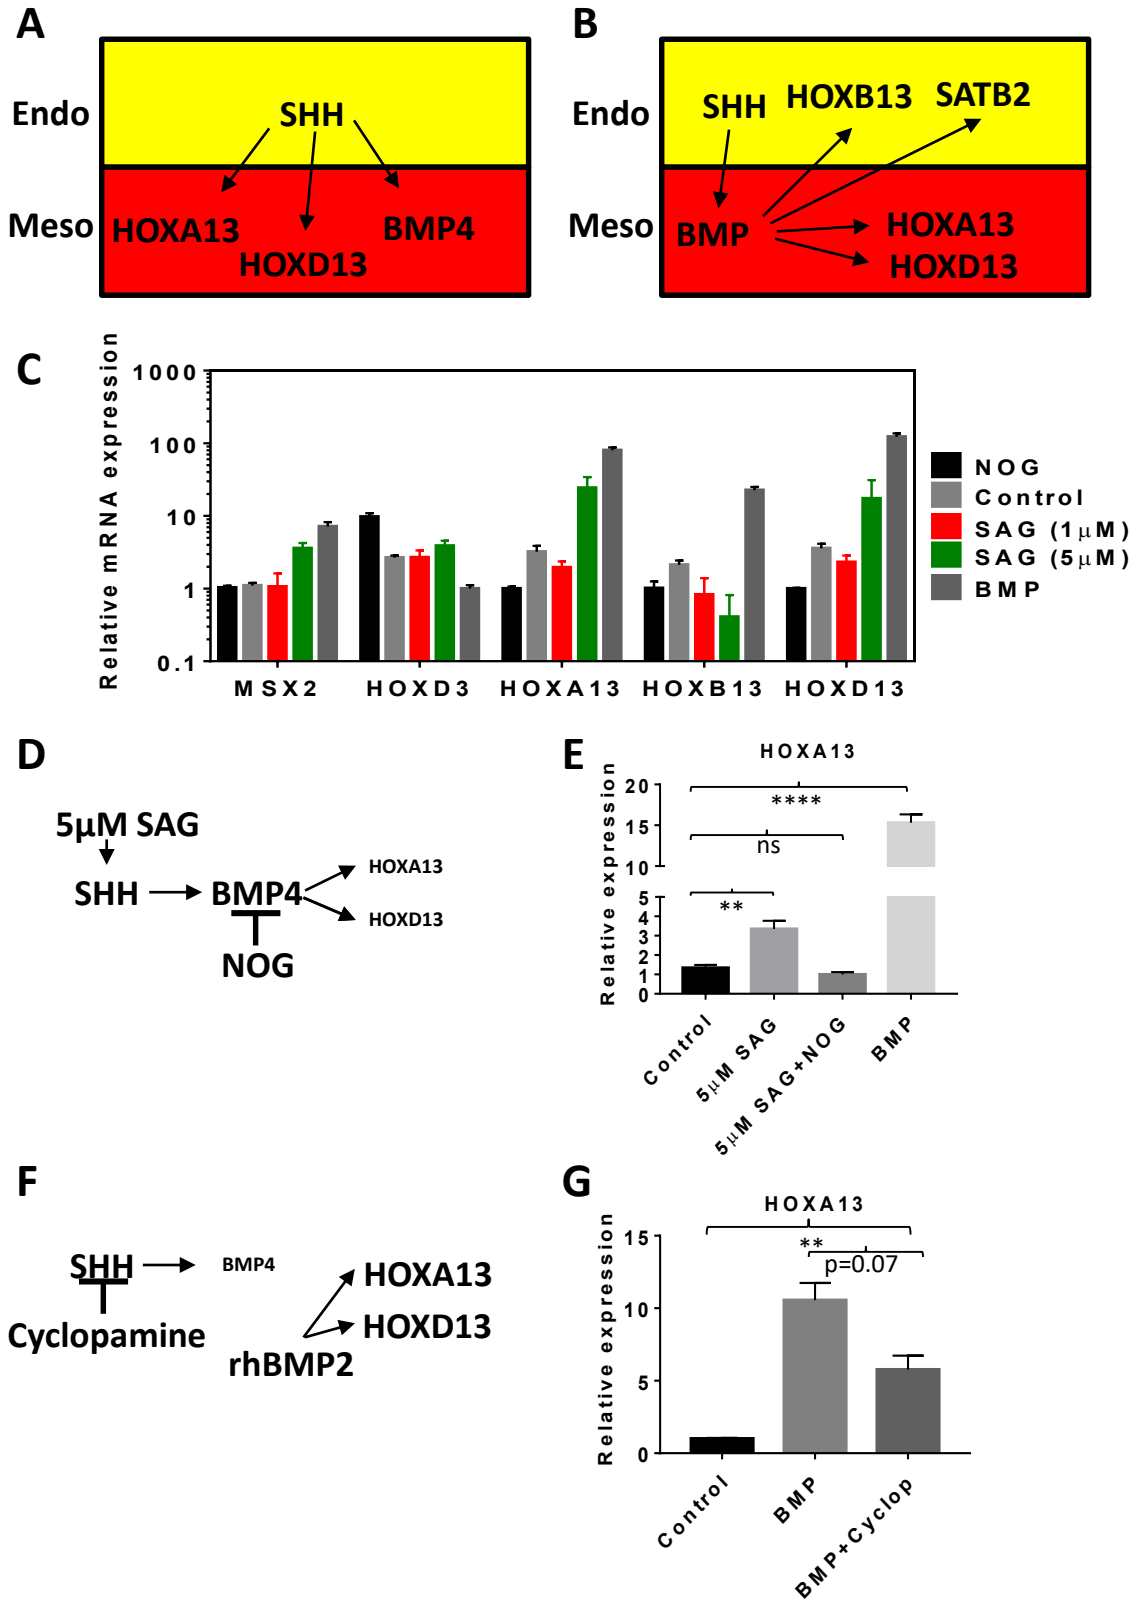

Figure S4 Related to Figure 3

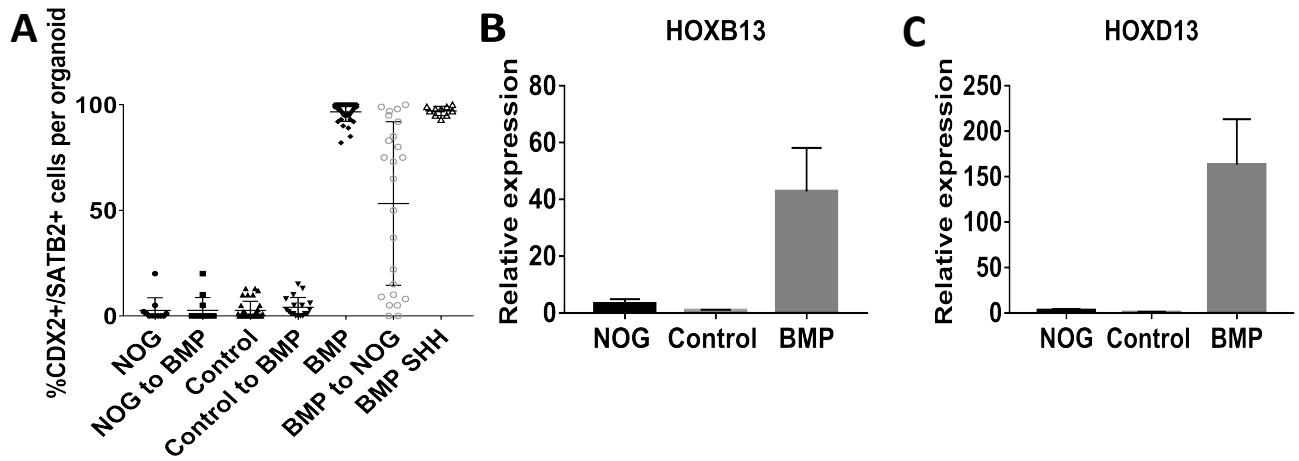

44 day old organoids

NOG

Control

BMP

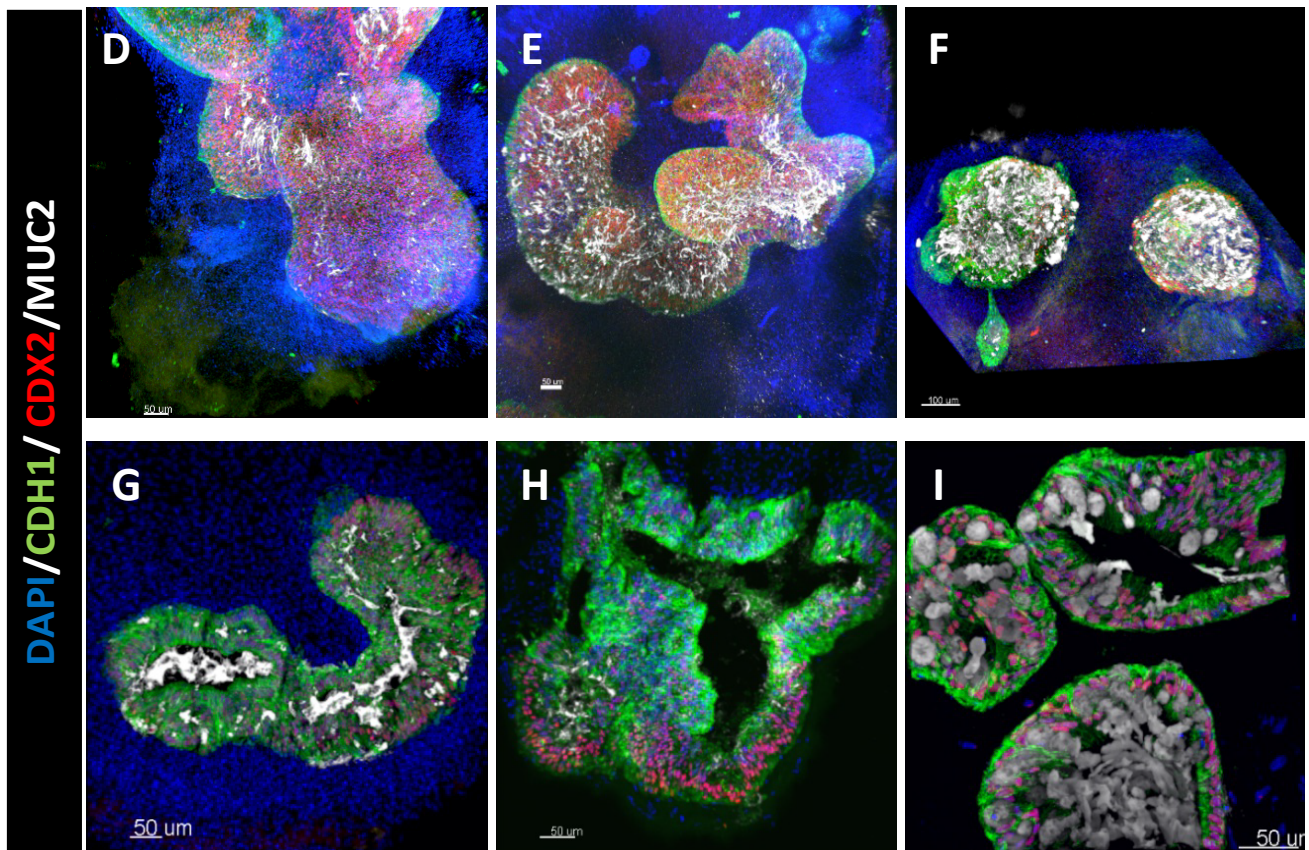

44 day old BMP organoids

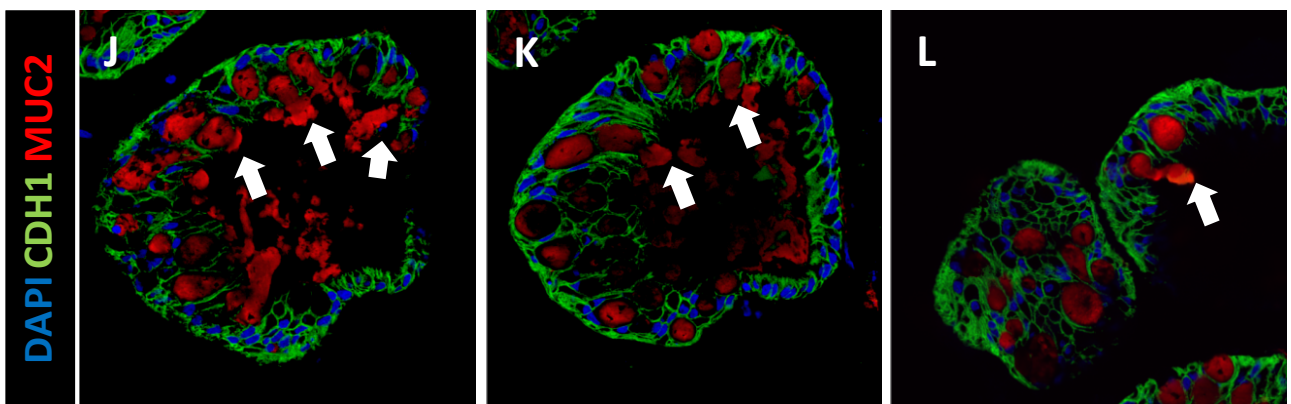

Figure S5 Related to Figure 5

### Transplanted organoids

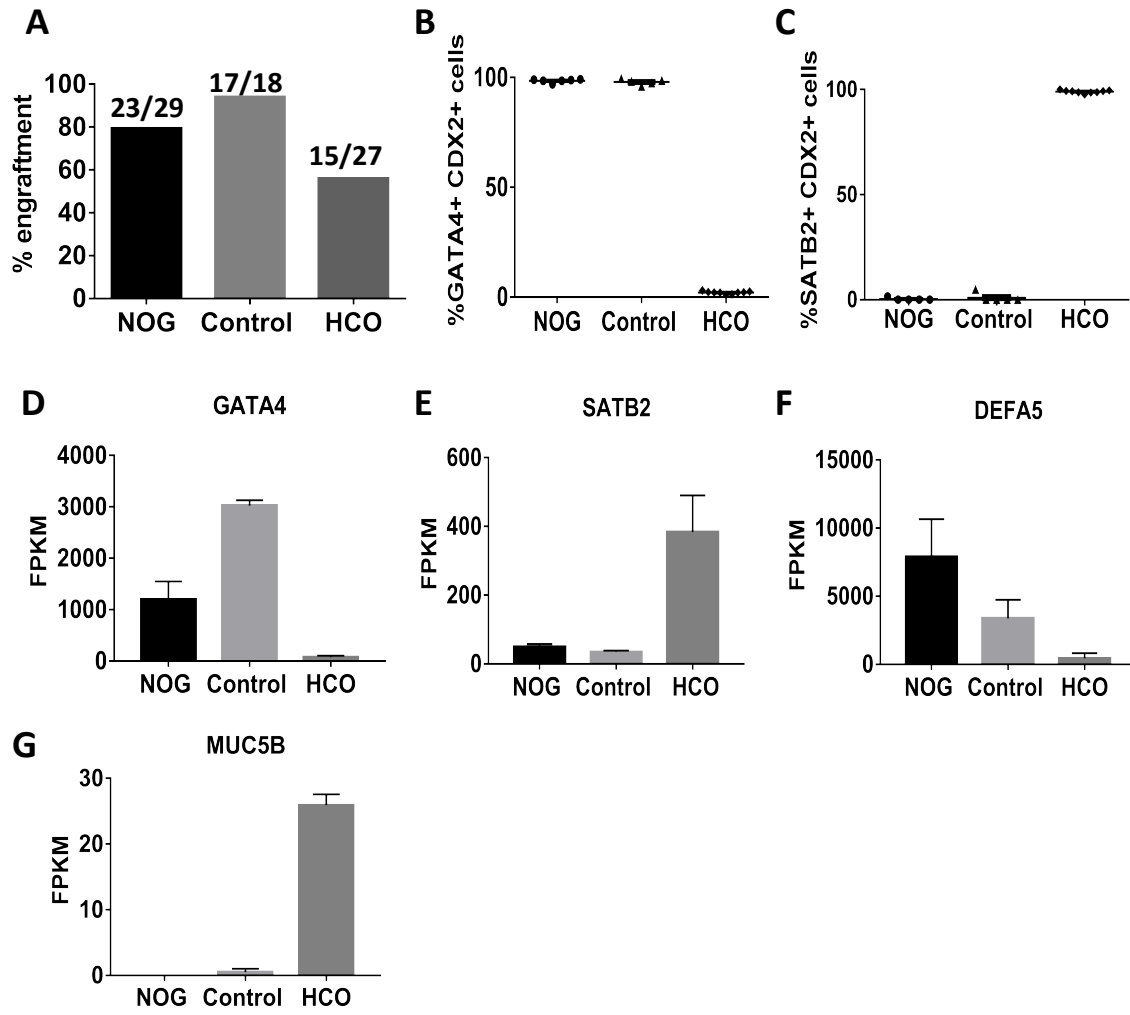

### Human biopsy

### Transplanted organoids

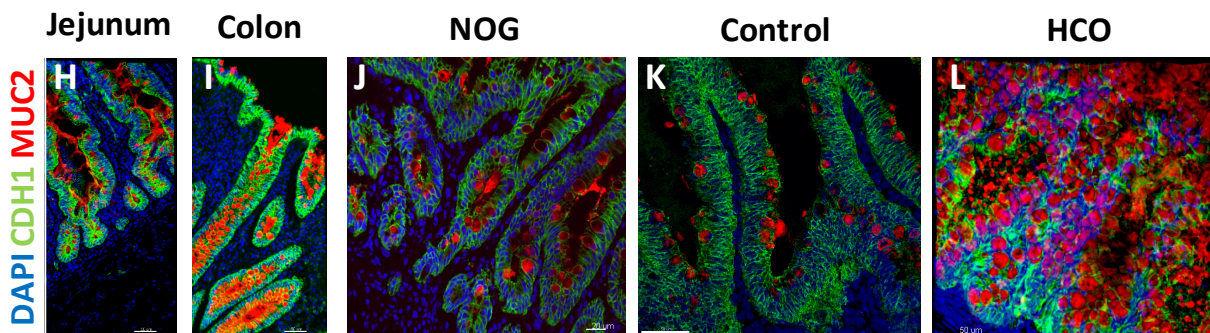

Figure S6 Related to Figure 6

*In vitro* grown organoids

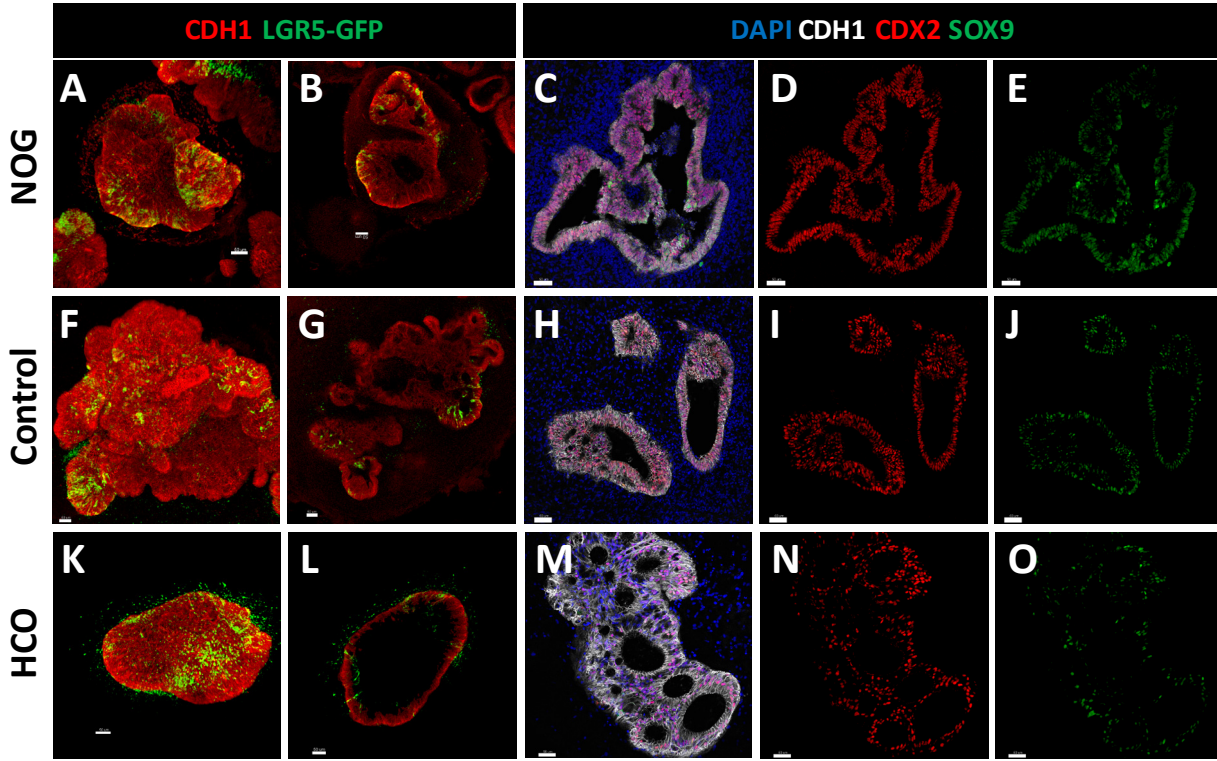

*In vivo* transplanted organoids

Graft derived enteroids

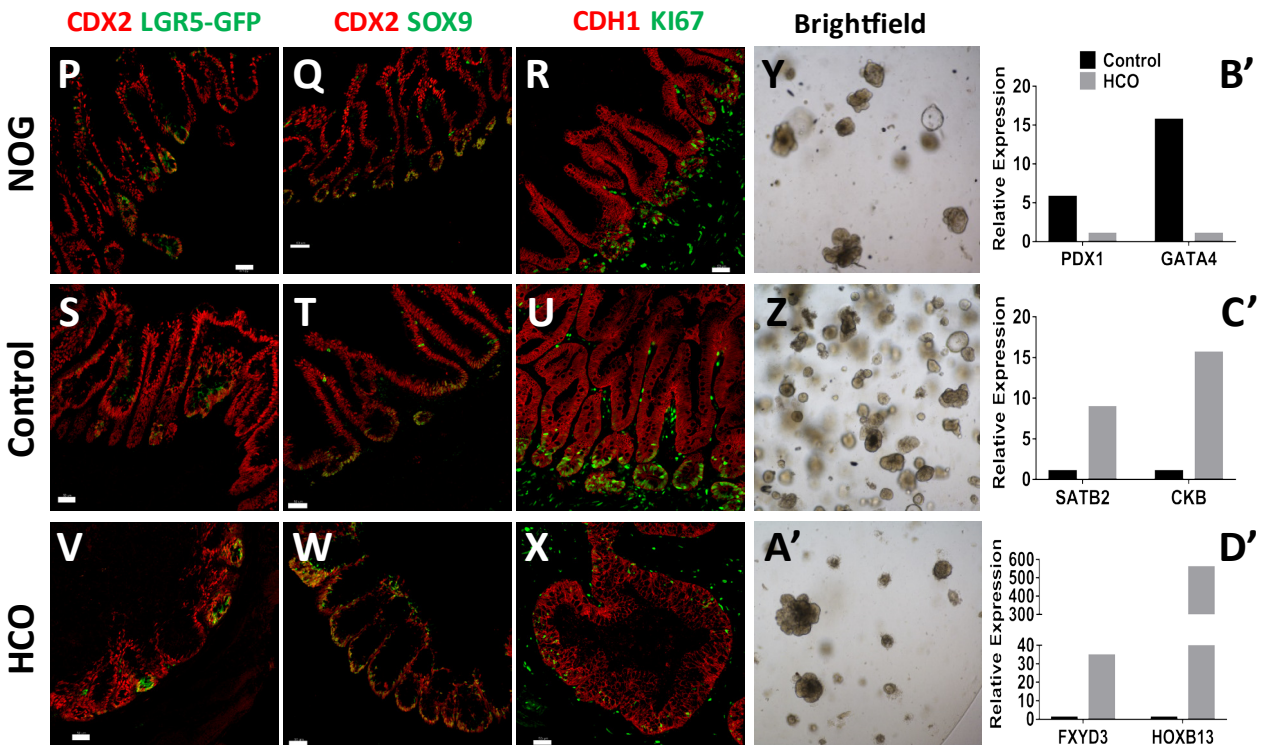

**Figure S7 Related to Figure 7**

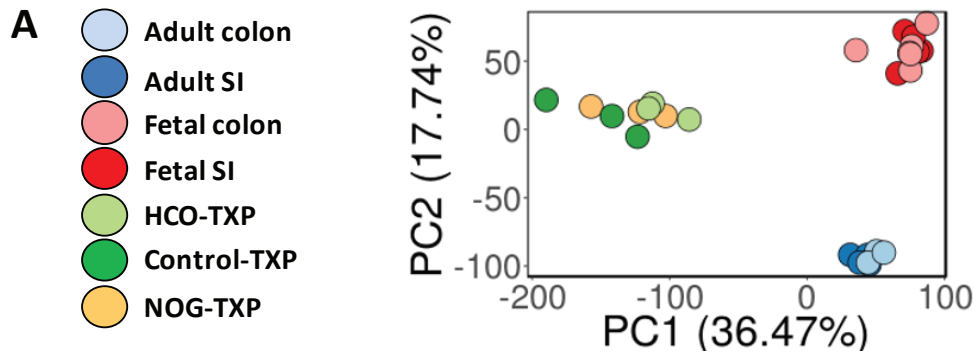

**B**  
Up in TXPs vs primary tissues

| Category               | Name                                                        | p-value  |
|------------------------|-------------------------------------------------------------|----------|
| Pathway                | Ribosome                                                    | 2.20E-57 |
| GO: Cellular Component | ribosomal subunit                                           | 3.20E-55 |
| GO: Cellular Component | ribosome                                                    | 2.61E-48 |
| GO: Molecular Function | structural constituent of ribosome                          | 5.07E-46 |
| GO: Cellular Component | cytosolic ribosome                                          | 1.66E-41 |
| GO: Cellular Component | large ribosomal subunit                                     | 2.43E-39 |
| GO: Biological Process | SRP-dependent cotranslational protein targeting to membrane | 8.02E-39 |
| GO: Biological Process | protein targeting to ER                                     | 1.14E-36 |
| GO: Cellular Component | mitochondrion                                               | 7.71E-36 |
| GO: Biological Process | cotranslational protein targeting to membrane               | 1.57E-35 |

**C**  
Up primary tissues vs in TXPs

| Category               | Name                                         | p-value  |
|------------------------|----------------------------------------------|----------|
| GO: Biological Process | leukocyte activation                         | 2.26E-22 |
| GO: Biological Process | immune system process                        | 3.25E-22 |
| GO: Biological Process | cell activation                              | 1.46E-21 |
| GO: Biological Process | positive regulation of immune system process | 2.72E-19 |
| GO: Cellular Component | plasma membrane part                         | 1.89E-18 |
| GO: Biological Process | lymphocyte activation                        | 3.14E-18 |
| GO: Biological Process | leukocyte cell-cell adhesion                 | 6.71E-18 |
| GO: Biological Process | single organismal cell-cell adhesion         | 8.69E-18 |
| GO: Biological Process | immune response                              | 8.81E-18 |
| GO: Biological Process | intracellular signal transduction            | 2.82E-17 |

**Table S2. List of QPCR primers used in this study. Related to Figures 3 and 4.**

| GENE            | Sequence                |
|-----------------|-------------------------|
| CDH1 FWD        | GACCGGTGCAATCTTCAAA     |
| CDH1 REV        | TTGACGCCGAGAGCTACAC     |
| CHGA FWD        | TGTGTCGGAGATGACCTCAA    |
| CHGA REV        | GTCCTGGCTCTTCTGCTCTG    |
| CKB FWD         | CCCACACCAGGAAGGTCTTA    |
| CKB REV         | CCTCTTCGACAAGCCCGT      |
| FXD3 FWD        | AGGGTCACCTTCTGCATGTC    |
| FXD3 REV        | CTTCGGATAAACGCAGGACT    |
| GATA4 FWD       | TAGCCCCACAGTTGACACAC    |
| GATA4 REV       | GTCCTGCACAGCCTGCC       |
| HOXA13 FWD      | GCACCTTGGTATAAGGCACG    |
| HOXA13 REV      | CCTCTGGAAGTCCACTCTGC    |
| HOXB13 FWD      | GCTGTACGGAATGCGTTTCT    |
| HOXB13 REV      | AACCCACCAGGTCCCTTTT     |
| HOXD13 FWD      | CCTCTTCGGTAGACGCACAT    |
| HOXD13 REV      | CAGGTGTAAGTGCACCAAGGA   |
| HOXD3 FWD       | CACCTCCAATGTCTGCTGAA    |
| HOXD3 REV       | CAAAATTCAAGAAAACACACACA |
| INSL5 FWD       | GAAGGTTTTGCGCTGGATT     |
| INSL5 REV       | GATCCCTCAAGCTCAGCAAG    |
| MSX2 FWD        | GGTCTTGTGTTTCCTCAGGG    |
| MSX2 REV        | AAATTCAGAAGATGGAGCGG    |
| MUC2 FWD        | TGTAGGCATCGCTCTTCTCA    |
| MUC2 REV        | GACACCATCTACCTCACCCG    |
| ONECUT1 Fwd     | TTTTTGGGTGTGTTGCCTCT    |
| ONECUT1 Rev     | AGACCTTCCGGAGGATGTG     |
| PDX1 FWD        | CGTCCGCTTGTCTCCTC       |
| PDX1 REV        | CCTTTCCCATGGATGAAGTC    |
| PPIA (CPHA) FWD | CCCACCGTGTCTTCGACATT    |
| PPIA (CPHA) REV | GGACCCGTATGCTTTAGGATGA  |
| SATB2 FWD       | CCACCTTCCCAGCTTGATT     |
| SATB2 REV       | TTAGCCAGCTGGTGGAGACT    |



**Table S3. List of antibodies used in this study. Related to Figures 1-6.**

| <b>ANTIBODY</b>                      | <b>HOST</b>       | <b>Catalog number</b>        | <b>Dilution</b> | <b>Notes</b> |
|--------------------------------------|-------------------|------------------------------|-----------------|--------------|
| B-Catenin                            | rabbit            | Santa Cruz #sc-7199          | 1:200           |              |
| CDH17*                               | rabbit            | Sigma #HPA023616             | 1:1,500         |              |
| Cdx2                                 | mouse             | BioGenex cdx2-88             | 1:300           |              |
| Cdx2                                 | rabbit monoclonal | Cell Marque EPR2764Y         | 1:100           |              |
| Chr-A (C20)                          | goat              | Santa Cruz #sc-1488          | 1:100           |              |
| DEFA5*                               | mouse monoclonal  | Novus BiologicalsNB110-60002 | 1:60,000        |              |
| E-Cadherin                           | goat              | R&D #AF648                   | 1:400           |              |
| E-Cadherin (mouse-specific)          | rat               | R&D #MAB7481                 | 1:500           |              |
| E-Cadherin                           | mouse             | R&D #AF648                   | 1:500           |              |
| FoxA2                                | goat              | Santa Cruz #sc-6554          | 1:500           |              |
| GATA4                                | goat              | Santa Cruz #sc-1237          | 1:100           |              |
| GATA4                                | rabbit            | Santa Cruz #sc-9053          | 1:100           |              |
| GFP (green fluorescent protein)      | rabbit            | Invitrogen #A11122           | 1:1,000         |              |
| Ghrelin                              | goat              | Santa Cruz #sc-10368         | 1:500           |              |
| GIP (Gastric Inhibitory Polypeptide) | goat              | Santa Cruz #sc-23554         | 1:500           |              |
| GLP-1                                | mouse             | BioVision #3104-100          | 1:200           |              |
| HNF-6 (ONECUT1)                      | rabbit            | Santa Cruz #sc-13050         | 1:100           |              |
| INSL5 (H-110)*                       | rabbit            | Santa Cruz #sc-67190         | 1:100           |              |
| KI67                                 | rabbit monoclonal | Cell Marque SP6              | 1:100           |              |
| Motilin                              | mouse monoclonal  | Santa Cruz #sc-376605        | 1:100           |              |
| Mucin 5B*                            | rabbit            | Santa Cruz #sc-20119         | 1:100           |              |
| Mucin2 (MUC2)                        | rabbit            | Santa Cruz #sc-15334         | 1:200           |              |
| Peptide YY                           | rabbit            | Abcam #ab22663               | 1:1000          |              |

**Table S3. List of antibodies used in this study. Related to Figures 1-6.**

|                                            |                      |                              |          |                                             |
|--------------------------------------------|----------------------|------------------------------|----------|---------------------------------------------|
| pSmad 1/5/8                                | rabbit               | Cell Signaling<br>9511S      | 1:100    | Discontinued<br>and replaced<br>with 13820S |
| pSmad 2/3                                  | rabbit               | Cell Signaling<br>9510S      | 1:100    |                                             |
| SATB2                                      | rabbit<br>monoclonal | Cell Marque<br>EP281         | 1:100    |                                             |
| SATB2<br>(SATBA4610)*                      | mouse<br>monoclonal  | Santa Cruz #sc-<br>81376     | 1:100    |                                             |
| Sox9                                       | rabbit               | Millipore #AB5535            | 1:10,000 |                                             |
| Alexafluor ®<br>Donkey anti-goat<br>488    | donkey               | Life Technologies<br>A-11055 | 1:500    |                                             |
| Alexafluor ®<br>Donkey anti-goat<br>568    | donkey               | Life Technologies<br>A-11057 | 1:500    |                                             |
| Alexafluor ®<br>Donkey anti-<br>mouse 568  | donkey               | Life Technologies<br>A-10037 | 1:500    |                                             |
| Alexafluor ®<br>Donkey anti-<br>rabbit 647 | donkey               | Life Technologies<br>A-31573 | 1:500    |                                             |
| Alexafluor ®<br>Donkey anti-rat<br>488     | donkey               | Life Technologies<br>A-21208 | 1:500    |                                             |

**Figure S1 Related to Figure 1.** Gata4 and Satb2 mark discreet regional boundaries during development of the small and large intestines.

**(A)** Whole-mount staining of Gata4 (green) and Satb2 (red) in an e9.5 mouse embryo showing expression boundary at the yolk stalk (n=9). **(B)** Model depicting Gata4 and Satb2 expression domains e11.5 intestine showing a transitional zone of low Gata4 and low Satb2 expression. **(C-E)** Whole-mount staining of Gata4 and Satb2 in an e11.5 mouse embryo showing posterior boundary of Gata4 and anterior boundary of Satb2 at the yolk stalk (n=3). **(F-H)** Whole-mount staining of Satb2 and Foxa2 in an e12.5 mouse embryo showing that the anterior boundary of Satb2 expression is maintained (n=3). **(I)** Whole-mount staining of Gata4 and Satb2 in proximal intestine isolated from an e16.5 mouse embryo (n=6). **(J)** Whole-mount staining of Gata4 and Satb2 in distal small intestine and large intestine isolated from an e16.5 mouse embryo (n=6). Staining of GATA4 and SATB2 in section of **(K)** human jejunum (n=2) and **(L)** colon (n=2). Scale bars = 50  $\mu\text{m}$  **(B-D)** and 100  $\mu\text{m}$  **(E-M)**. Dotted lines in **(C)** and **(F)** mark the approximate location of the umbilicus. Abbreviations: ys, yolk stalk; cb, cecal bud; tz, transition zone; mx, maxillary; and md, mandibular portion of first brachial arch; ti, terminal ileum; icj, ileocecal junction.

**Figure S2 Related to Figure 1.** SATB2 is expressed in GATA4 negative human small and large intestine.

**(A)** SATB2 staining in human adult duodenum, small intestine, appendix, colon and rectum showing that SATB2 expression is present in distal small intestine and the entire large intestine. **(B)** Analysis of GATA4 and SATB2 from published RNA-seq data from human adult and fetal intestinal samples. Samples plotted include human adult duodenum (HuSI\_Duo\_A), human adult small intestine distal to duodenum (HuSI\_Dist\_A), human adult colon (HuColon\_A) and human fetal small intestine (HuSI\_F). **(C)** Analysis of GATA4 and SATB2 expression from microarray data generated by Wang et al. 2015 on fetal intestinal stem cells from duodenum (Duo), jejunum (Jej), ileum (Ile), ascending colon (AC), transverse colon (TC) and Descending colon grown in Air Liquid Interface (ALI).  $r^2$  values were determined using CORREL function in Excel. **(D)** 3D principal component (without Z-correction) of nascent spheroids and spheroids after 3 days of patterning.

**Figure S3 Related to Figure 2.** BMP mediates SHH activation of posterior HOX genes.

**(A)** Previous model of SHH-mediated activation of posterior HOX genes. **(B)** New model of SHH mediated activation of posterior HOX genes and BMP-mediated activation of endoderm HOX genes. **(C)** QPCR analysis of HOX factors following treatment with NOGGIN, control, Smoothed agonist (SAG), or BMP2 (n=3 per condition). **(D)** Model of BMP4 dependent activation of HOX13 genes induced by SAG. **(E)** QPCR analysis of HOXA13 in control, 5  $\mu\text{M}$  SAG, 5  $\mu\text{M}$  SAG + NOG and BMP2 treated organoids after 3 days. **(F)** Model of SHH independent activation of HOX13 genes induced by exogenous recombinant human BMP2. **(G)** QPCR analysis of HOXA13 in control, BMP, and BMP + Cyclopamine treated organoids after 3 days (n=6 per condition).

**Figure S4 Related to Figure 3.** Extended *in vitro* culture allows maturation of goblet cells.

**(A)** Quantitation of the percentage of CDX2+ SATB2+ cells in organoids which were patterned and were then re-patterned. QPCR analysis of HOXB13 **(B)** and HOXD13 **(C)** in 28 day old NOGGIN (n=6), Control (n=8) and BMP2 (n=5) organoids. **(D-F)** Whole-mount and **(G-I)** cross section staining with CDH1 (green), CDX2 (red), and MUC2 (white) from 44 day old NOGGIN, Control, and BMP treated organoids. **(J-L)** Staining of sections from 44 day old BMP2 treated organoids. White arrows points to goblet cells which were in the process of secreting Mucin 2. For IF a minimum of 10 organoids per condition were examined. Scale bars= 50  $\mu$ m.

**Figure S5 Related to Figure 5.** BMP patterning of organoids is stable *in vitro* and *in vivo*.

**(A)** Efficiency of organoid engraftment of NOGGIN, Control, and BMP patterned organoids. Quantitation of the percentage of GATA4+ CDX2+ cells **(B)** and SATB2+ CDX2+ cells **(C)** in transplanted patterned organoids. FPKM values from RNA-seq data for GATA4 **(D)** SATB2 **(E)** DEFA5 **(F)** and MUC5B **(G)** in transplanted organoids (n=3 per condition). MUC2 (red) staining of **(H-I)** human jejunum and colon biopsies (n=2 per region) and **(J-L)** transplanted organoids (n=5 per condition). Scale bars= 50  $\mu$ m.

**Figure S6 Related to Figure 6.** *In vitro* and *in vivo* grown organoids contain intestinal progenitors.

Representative whole-mount **(A,F,K)** and slice section **(B,G,L)** images of CDH1 and GFP from H9-LGR5-GFP derived organoids treated with NOGGIN, control, or BMP. CDX2 (red) and SOX9 (green) staining on sections from **(C-E)** NOGGIN, **(H-J)** control, or **(M-O)** BMP2 treated organoids (n=5 organoids per condition for each staining combination). Representative images of CDX2 and LGR5-GFP **(P,S,V)**, CDX2 and SOX9 **(Q,T,W)**, and CDH1 and KI67 **(R,U,X)** stained *in vivo* organoids derived from H9-LGR5-GFP organoids treated with NOGGIN, control, or BMP (n=3 organoids per condition). **(Y-A')** Stereomicrographs showing enteroids derived from NOGGIN, control or BMP transplants respectively. **(B'-D')** QPCR analysis of proximal and distal genes in control enteroids (>100 pooled enteroids from 2 transplants) and BMP2 treated colonoids (>50 colonoids from 1 transplant). Scale bars= 50  $\mu$ m.

**Figure S7 Related to Figure 7.** Ribosome and immune cell signatures are differentially expressed between transplanted organoids and primary human tissues.

**(A)** Principal component analysis of patterned transplanted organoids and human adult and fetal small intestine and colon. **(B)** Gene ontology analysis of genes upregulated in transplants versus human primary tissues. **(C)** Gene ontology analysis of genes upregulated in human primary tissues versus transplants.

Table S1. Genes upregulated in adult small intestine and colon which are also upregulated in HIOs and HCOs respectively. Related to Figure 7.

Table S2. List of QPCR primers used in this study. Related to Figure 3 and 4.

Table S3. List of antibodies used in this study. Related to Figure 1-6.
